# Supplementary material for: Calcareous sponge genomes reveal complex evolution of α-carbonic anhydrases and two key biomineralization enzymes
Source: PubMed Central journal article supplement (PMC4265532; doi:10.1186/s12862-014-0230-z), 2014-11-25
Supplement: 12862_2014_230_MOESM3_ESM.pdf [file 12862_2014_230_MOESM3_ESM.pdf]

```
+ +ZZ+++Z ++ ++
Hsa CA II SNQHHEHVVYTPWR
SciCA1(scl-CA1) .....
SciCA2(scl-CA2) ..N.....
SciCA3 ..N.....
SciCA4 ..S....D..S...
SciCA5 ..N.....
SciCA6 ..N.....A...
SciCA7 ..N.....
SciCA8 ..N.....
LcoCA1(scl-CA1) .....
LcoCA2 T.N.....
LcoCA3(scl-CA2) ..N.....
LcoCA4 .....
LcoCA5 .....
SciCA9(L-CA) ..R.D..QI.S...
LcoCA6(L-CA) ..R.D..QI.S...
Hsa CA VIII ..R.....I...
Hsa CA X ..R.....QI...
Hsa CA XI ..RL...QI.S...
Spu XM_779703 ..R.....QIS....
```
