# Supplementary material for: Calcareous sponge genomes reveal complex evolution of α-carbonic anhydrases and two key biomineralization enzymes
Source: PubMed Central journal article supplement (PMC4265532; doi:10.1186/s12862-014-0230-z), 2014-11-25
Supplement: 12862_2014_230_MOESM5_ESM.pdf [file 12862_2014_230_MOESM5_ESM.pdf]

| Group                       | Organism                             | Data source                                                                                                                               | Data version                        | Accession/ Sequence IDs                                                                                                                                                       |
|-----------------------------|--------------------------------------|-------------------------------------------------------------------------------------------------------------------------------------------|-------------------------------------|-------------------------------------------------------------------------------------------------------------------------------------------------------------------------------|
| Chordata                    | <i>Homo sapiens</i> (CA I-CA XIV)    | NCBI                                                                                                                                      | n.a.                                | NP_001729, NP_000058, NP_005172, NP_000708, NP_001730, NP_009151, NP_001206, NP_005173, NP_004047, NP_001207, NP_064563, NP_001208, NP_001209, NP_940986, NP_036245           |
| Cnidaria (Anthozoa)         | <i>Nematostella vectensis</i>        | JGI<br>( <a href="http://genome.jgi.doe.gov/">http://genome.jgi.doe.gov/</a> )                                                            | N.vectensis v1.0 models             | 90817, 101864, 107048, 118835, 121435, 170763, 200803                                                                                                                         |
| Cnidaria (Hydrozoa)         | <i>Hydra magnipapillata</i>          | Metazome<br>( <a href="http://www.metazome.net">http://www.metazome.net</a> )                                                             | proteome                            | 200790, 201739, 204588, 205404, 205916, 210525, 214600, 214755, 214850, 218646, 218650, 222739, 226119, 227670, 228978, 233444                                                |
| Ctenophora                  | <i>Mnemiopsis leidyi</i>             | NHGRI<br>( <a href="http://research.nhgri.nih.gov/mnemiopsis/">http://research.nhgri.nih.gov/mnemiopsis/</a> )                            | Mnemiopsis leidyi transcriptome 2.2 | ML009152a, ML01323a, ML01591a, ML044613a, ML36932a                                                                                                                            |
| Echinodermata               | <i>Strongylocentrotus purpuratus</i> | NCBI                                                                                                                                      | n.a.                                | XM_001199034, XM_776389, XM_777904, XM_779235, XM_779703, XM_785609, XM_789120, XM_790272, XM_791432                                                                          |
| Placozoa                    | <i>Trichoplax adhaerens</i>          | JGI<br>( <a href="http://genome.jgi.doe.gov/">http://genome.jgi.doe.gov/</a> )                                                            | Triad1_best_transcripts             | 18497, 18628, 24380, 37760, 51646, 51647, 51649, 63940                                                                                                                        |
| Porifera (Calcarea)         | <i>Sycon raphanus</i>                | NCBI                                                                                                                                      | n.a.                                | HE610178                                                                                                                                                                      |
| Porifera (Demospongiae)     | <i>Amphimedon queenslandica</i>      | NCBI                                                                                                                                      | Aqu1                                | EF434873, EF434875, XM_003383369, XM_003388939                                                                                                                                |
| Porifera (Demospongiae)     | <i>Astrosclera willeyana</i>         | NCBI                                                                                                                                      | n.a.                                | EF434876, EF434877, EF434878                                                                                                                                                  |
| Porifera (Demospongiae)     | <i>Ephydatia muelleri</i>            | Compagen<br>( <a href="http://compagen.org">http://compagen.org</a> )                                                                     | EMUE_T-PEP_130911                   | m.57082, m.68550, m.266032, m.285462, m.288705                                                                                                                                |
| Porifera (Homoscleromorpha) | <i>Oscarella carmela</i>             | Compagen<br>( <a href="http://compagen.org">http://compagen.org</a> )                                                                     | OCAR_T-PEP_130911                   | m.15341, m.15344, m.306267, m.36523, m.36524, m.39771, m.65108                                                                                                                |
| Porifera (Hexactinellida)   | <i>Aphrocallistes vastus</i>         | ERA archive of the University of Alberta<br>( <a href="http://hdl.handle.net/10402/era.38025">http://hdl.handle.net/10402/era.38025</a> ) | AV4-1_Trinity.fa                    | (comp22564_c0_seq2*, comp3738_c0_seq1, comp7621_c0_seq1), (comp9306_c0_seq1*, comp9306_c0_seq2, comp9683_c0_seq1), (comp22564_c0_seq1*, comp22564_c0_seq3), comp21870_c0_seq1 |
| Proteobacteria              | <i>Klebsiella pneumoniae</i>         | NCBI                                                                                                                                      | n.a.                                | O52535                                                                                                                                                                        |
| Proteobacteria              | <i>Pectobacterium atrosepticum</i>   | NCBI                                                                                                                                      |                                     | Q6DAJ6                                                                                                                                                                        |
| Proteobacteria              | <i>Neisseria gonorrhoeae</i>         | NCBI                                                                                                                                      | n.a.                                | Q50940                                                                                                                                                                        |
| Chlorophyta                 | <i>Chlamydomonas reinhardtii</i>     | NCBI                                                                                                                                      | n.a.                                | P20507                                                                                                                                                                        |

\*identical sequences in sites selected for phylogeny given in parenthesis, only the marked sequence was included in analysis
